# Supplementary material
Source: PubMed Central journal article supplement (PMC9898164)
Supplement: NIHMS1856691-supplement-1.pdf [file NIHMS1856691-supplement-1.pdf]

Supp Figure S1

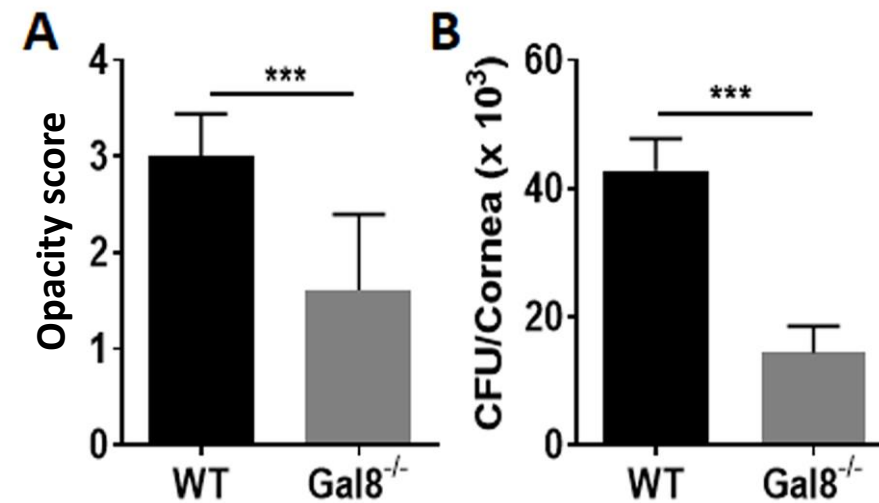

**Figure S1:** Resistance of Gal8<sup>-/-</sup> mice to PA keratitis on day 3 p.i.: Central corneas of Gal8<sup>-/-</sup> and WT (C57BL/6) mice were challenged with PA 6077 and the severity of bacterial keratitis was graded on day 3 post-infection (p.i.) and then corneas were harvested for bacterial enumeration. (A) Corneal opacity score n=14; (B) Bacterial load WT: n=20; Data are plotted as Mean±SEM. \*\*\*\*P<0.001 vs WT

Supp Figure S2

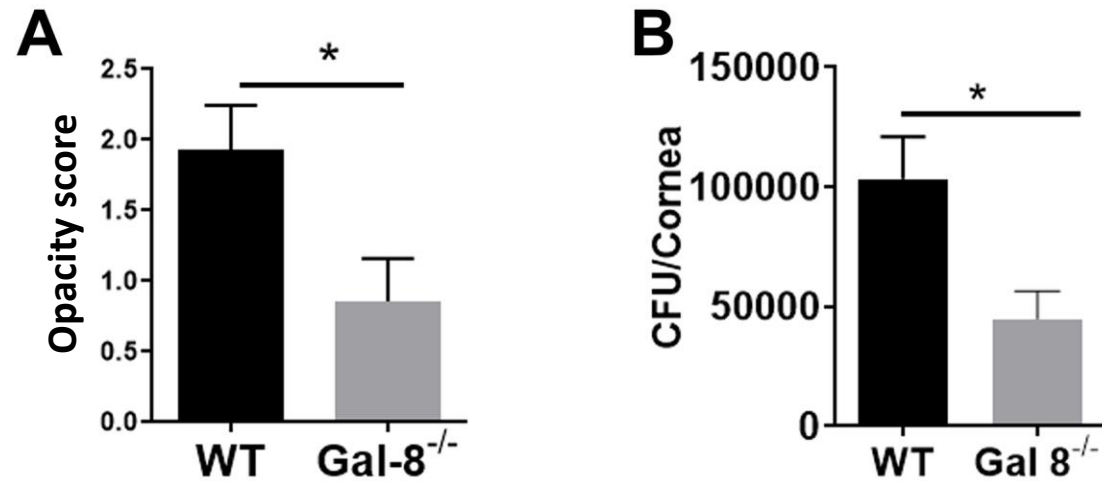

**Figure S2:** *Gal-8<sup>-/-</sup>* mouse corneas infected with PA6294 strain are resistant to PA keratitis: Central corneas of *Gal-8<sup>-/-</sup>* and WT (C57BL/6) mice were challenged with PA 6294 and the severity of bacterial keratitis was graded on day 1 post-infection (p.i.) and then corneas were harvested for bacterial enumeration. (A) Corneal opacity score n=7. (B) Bacterial load, WT: n=4; Gal8<sup>-/-</sup>: n=6. Data are plotted as Mean±SEM. \*P<0.05 vs WT.

Supp Figure S3

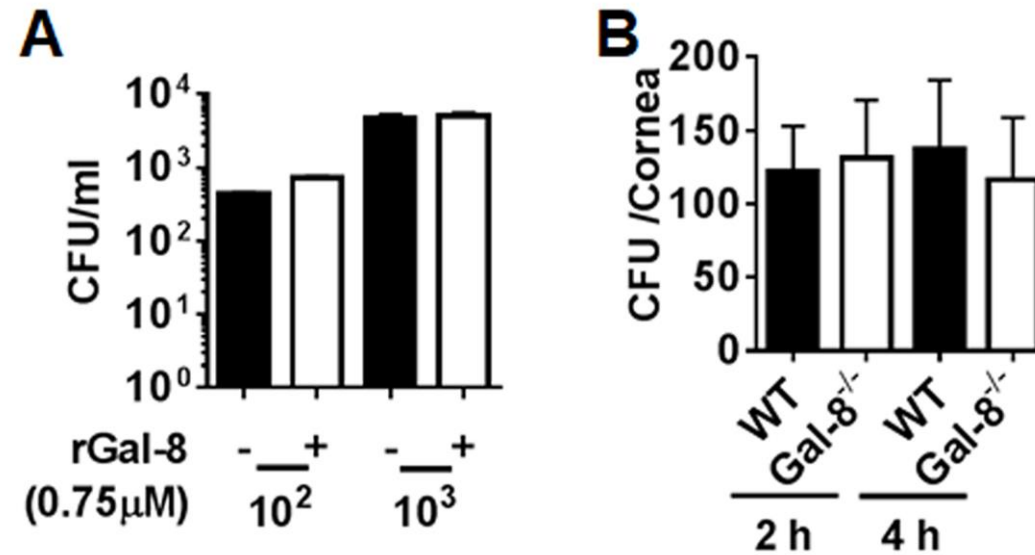

**Figure S3:** (A) *Gal-8* does not influence bacterial growth: Varying concentrations of PA were incubated with rGal-8 (0.75 μM) for 3h at 37°C, and then bacterial counts were enumerated by plating on BBL agar. (B) *Gal-8* does not influence adhesion of PA to corneal surface. Corneas of Gal-8<sup>-/-</sup> and WT mice were scarified and a 5-μl drop of bacteria was applied to the cornea; at 2h and 4h p.i., corneas were harvested for bacterial enumeration. A: Combined results of two independent experiments in triplicates are shown (n=6); B: Combined results of two independent experiments are shown (N=16 and 20 for KO and WT groups, respectively; 8-10 corneas/group/experiment).

Supp Figure S4

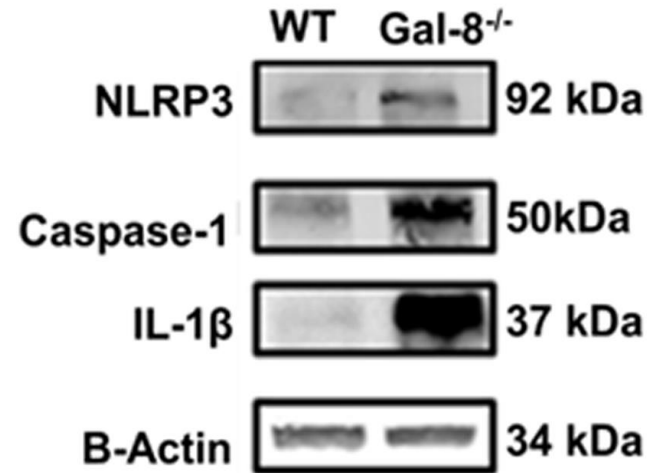

**Figure S4:** Expression levels of key components of inflammasome pathway are upregulated in infected corneas of Gal-8<sup>-/-</sup> mice: Infected WT and Gal-8<sup>-/-</sup> corneas were harvested on day 1p.i. and processed for Western blot analysis to examine the expression levels of NLRP3, Caspase-1, and IL-1β. A representative blot of three independent experiments done in duplicates is shown.
